# Supplementary material for: The zinc transporter Slc30a1 (ZnT1) in macrophages plays a protective role against attenuated Salmonella
Source: eLife journal article supplement (doi:10.7554/elife.89509), 2024-09-06
Supplement: fig2-data1 [file elife-89509-fig2-data1-v1.zip]

## Figure 2—Source data 1

### Raw images of western blot analysis for Slc30a1-flag expression.

Western blot analysis of Slc30a1-flag in BMDMs isolated from *Slc30a1<sup>flag-EGFP/+</sup>* mice for Figure 2B

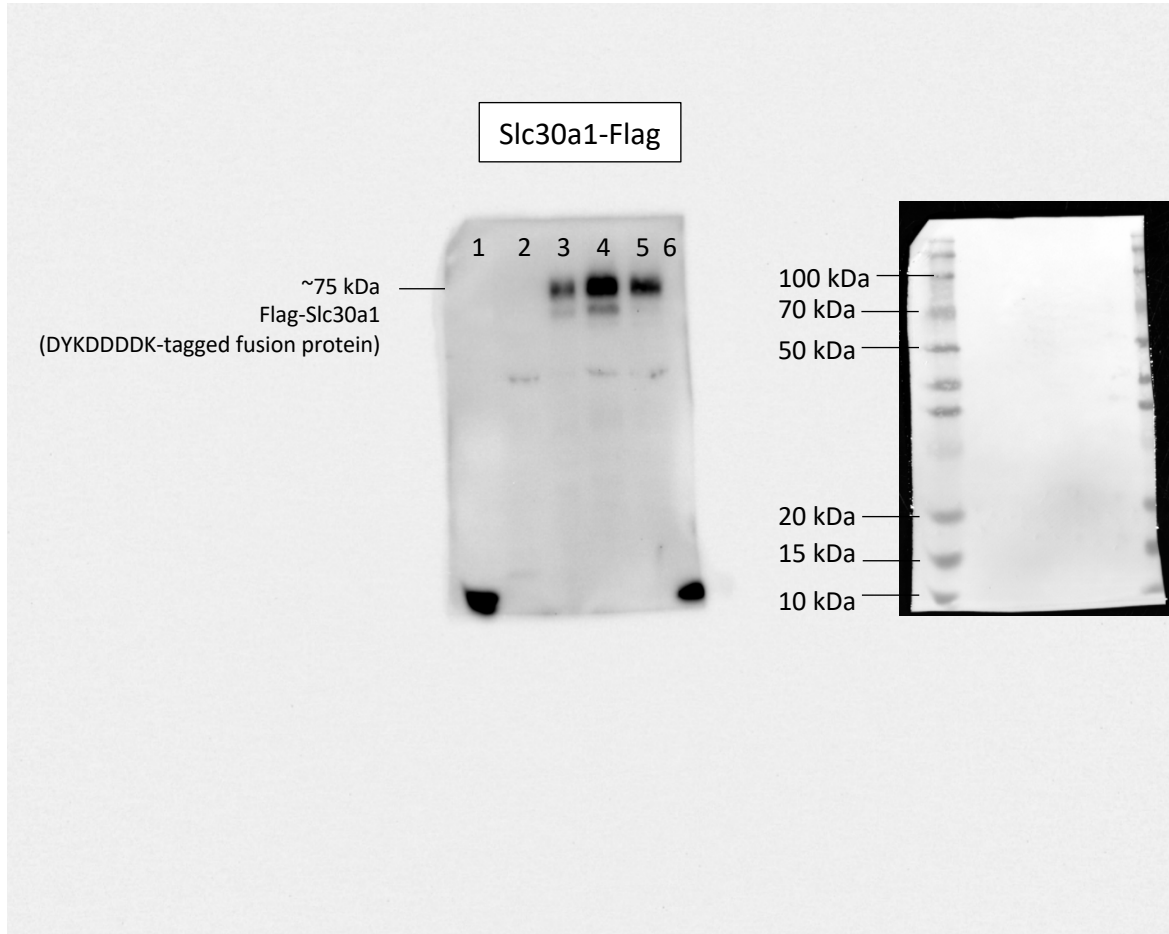

- Lane 1: Ladder
- Lane 2: Untreated (BMDM wild type)
- Lane 3: Untreated
- Lane 4: ZnSO<sub>4</sub> treatment (40  $\mu$ M)
- Lane 5: *Salmonella* (MOI = 1)
- Lane 6: Ladder

Western blot analysis of  $\beta$ -Actin in BMDMs isolated from *Slc30a1<sup>flag-EGFP/+</sup>* mice

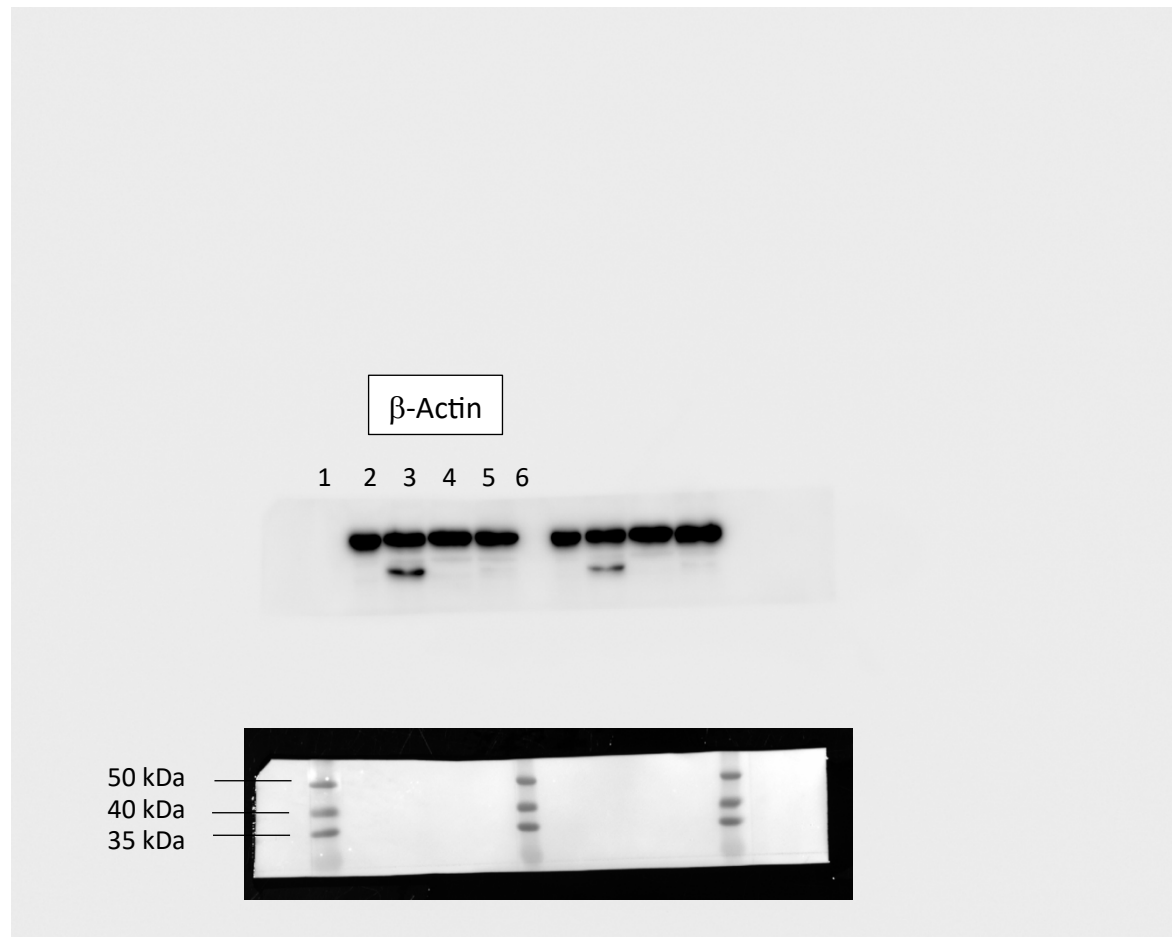

- Lane 1: Ladder
- Lane 2: Untreated (wild type)
- Lane 3: Untreated
- Lane 4:  $\text{ZnSO}_4$  treatment (40  $\mu\text{M}$ )
- Lane 5: *Salmonella* (MOI = 1)
- Lane 6: Ladder
