# Supplementary material for: The zinc transporter Slc30a1 (ZnT1) in macrophages plays a protective role against attenuated Salmonella
Source: eLife journal article supplement (doi:10.7554/elife.89509), 2024-09-06
Supplement: fig5-data1 [file elife-89509-fig5-data1-v1.zip]

**Figure 5–Figure supplement 1–Source data 1**  
**Raw images of western blot analysis for iNOS and related-cellular signaling proteins.**

Full unedited blots for Figure supplement 6C (iNOS expression in BMDM treated with HK-ST)

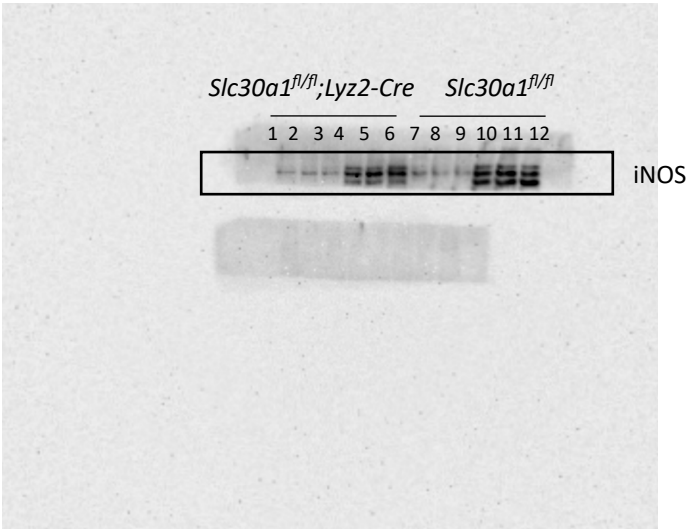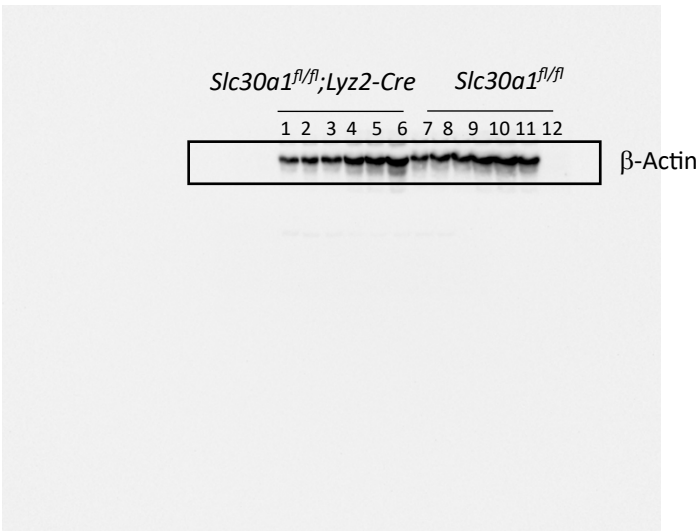

|                         |                                         |
|-------------------------|-----------------------------------------|
| Lane 1, 2, 3: Untreated | <i>Slc30a1<sup>fl/fl</sup>;Lyz2-Cre</i> |
| Lane 4, 5, 6: HK-ST     |                                         |
| Lane 7, 8, 9: Untreated | <i>Slc30a1<sup>fl/fl</sup></i>          |
| Lane 10, 11, 12: HK-ST  |                                         |

Full unedited blots for Figure supplement 6D (iNOS expression in BMDM treated with LPS)

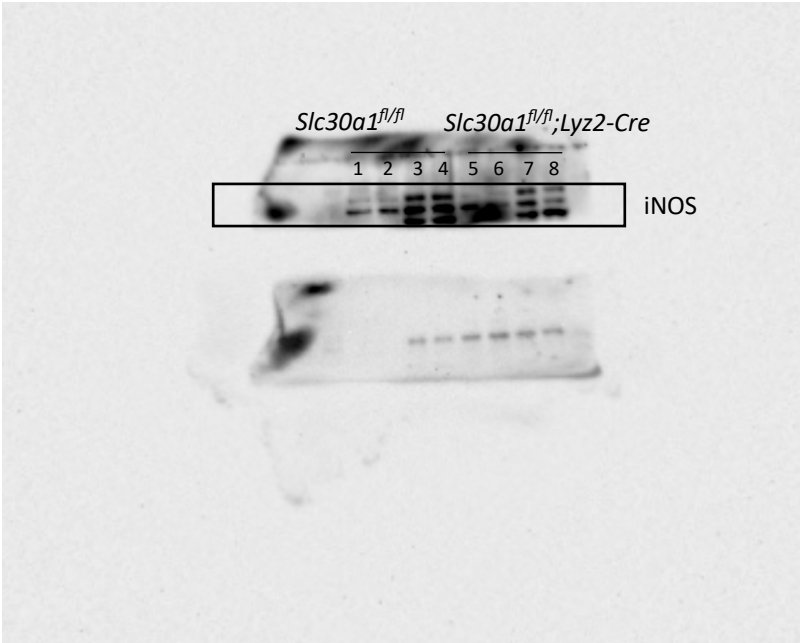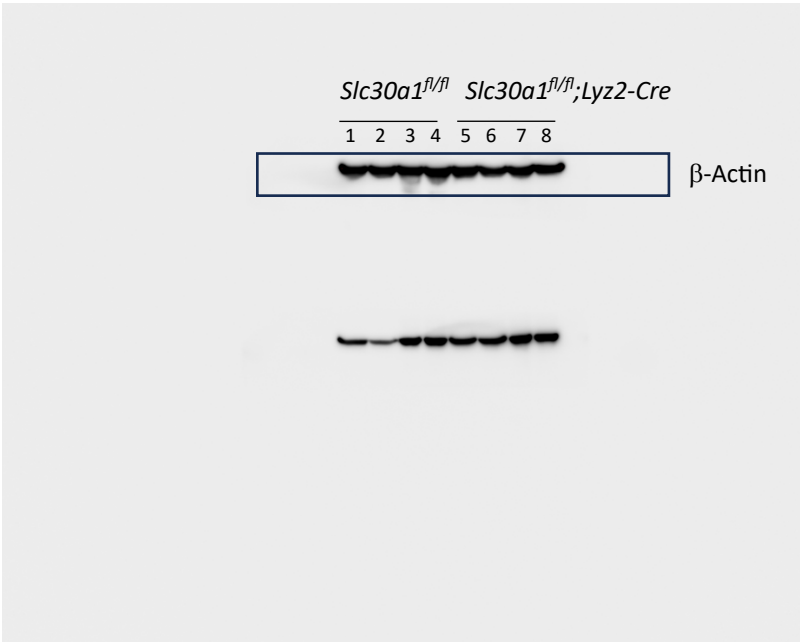

|                      |                                         |
|----------------------|-----------------------------------------|
| Lane 1, 2: Untreated | <i>Slc30a1<sup>fl/fl</sup></i>          |
| Lane 3, 4: LPS       |                                         |
| Lane 5, 6: Untreated | <i>Slc30a1<sup>fl/fl</sup>;Lyz2-Cre</i> |
| Lane 7, 8: LPS       |                                         |

Full unedited blots for Figure supplement 6F (cellular signaling proteins regulated *Nos2* expression in BMDM treated with LPS)

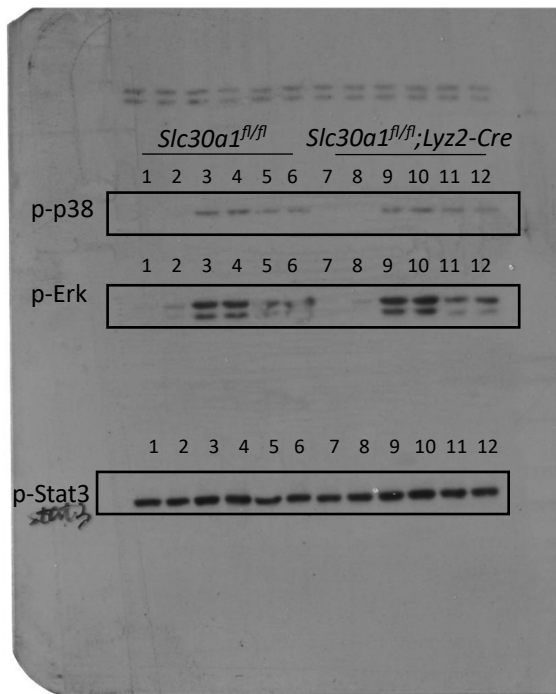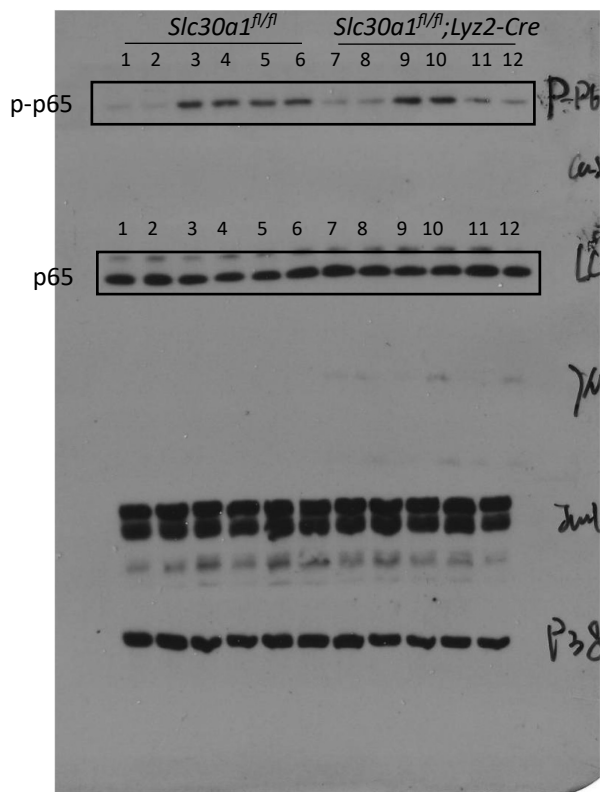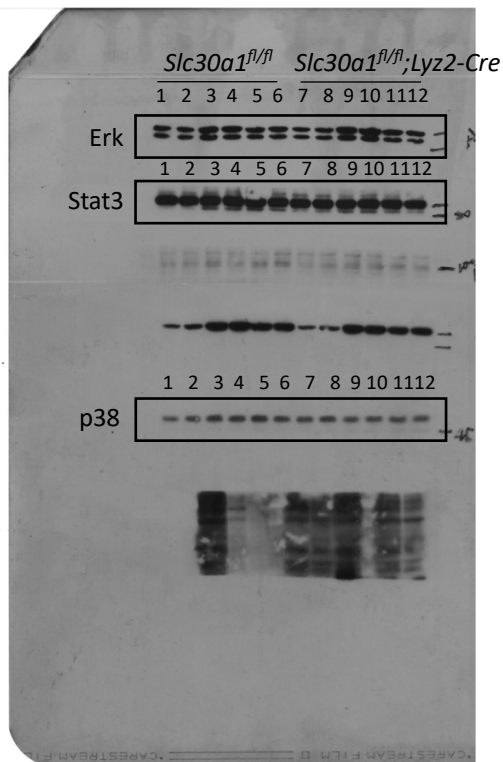

|                           |  |                                         |
|---------------------------|--|-----------------------------------------|
| Lane 1, 2: Untreated      |  | <i>Slc30a1<sup>fl/fl</sup></i>          |
| Lane 3, 4: LPS (30 min)   |  |                                         |
| Lane 5, 6: LPS (60 min)   |  |                                         |
| Lane 7, 8: Untreated      |  | <i>Slc30a1<sup>fl/fl</sup>;Lyz2-Cre</i> |
| Lane 9, 10: LPS (30 min)  |  |                                         |
| Lane 11, 12: LPS (60 min) |  |                                         |
