# Supplementary material for: The zinc transporter Slc30a1 (ZnT1) in macrophages plays a protective role against attenuated Salmonella
Source: eLife journal article supplement (doi:10.7554/elife.89509), 2024-09-06
Supplement: fig5-data2 [file elife-89509-fig5-data2-v1.zip]

**Figure 5–Source data 1**  
**Raw images of western blot analysis for iNOS and p65 expression.**

Full unedited blots for Figure 5F (iNOS expression in BMDM infected with *Salmonella*)

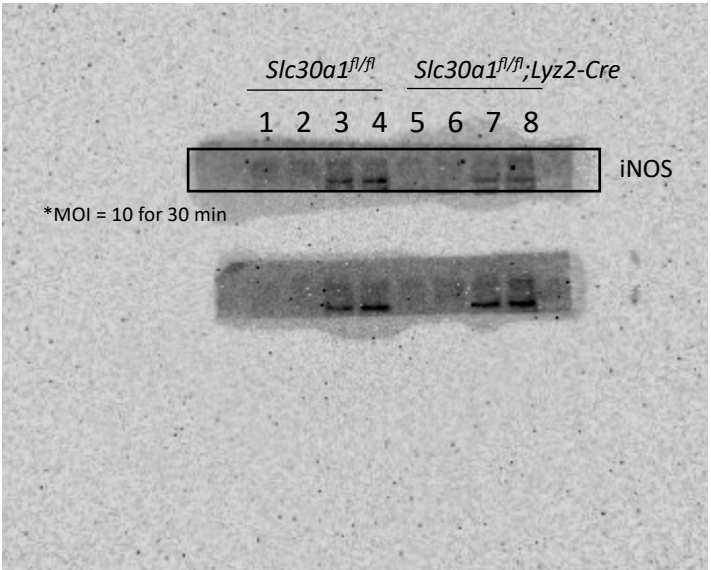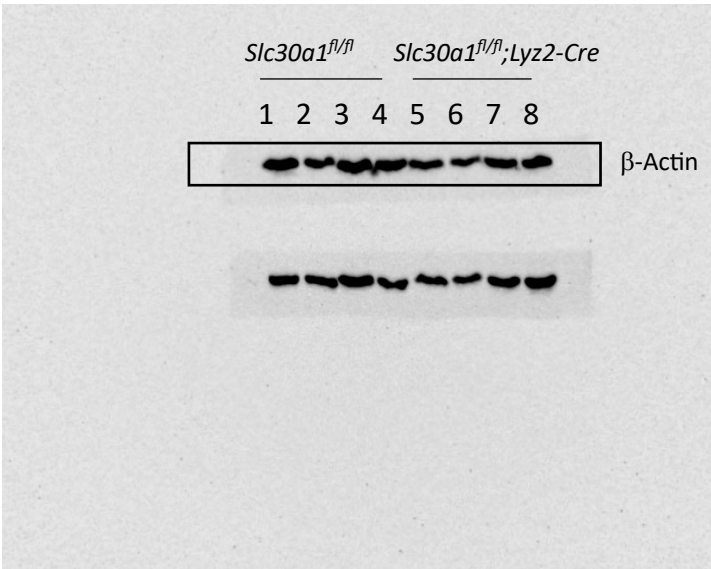

|                              |                                         |
|------------------------------|-----------------------------------------|
| Lane 1, 2: Untreated         | <i>Slc30a1<sup>fl/fl</sup></i>          |
| Lane 3, 4: <i>Salmonella</i> |                                         |
| Lane 5, 6: Untreated         | <i>Slc30a1<sup>fl/fl</sup>;Lyz2-Cre</i> |
| Lane 7, 8: <i>Salmonella</i> |                                         |

Full unedited blots for Figure 5H (p65 expression in BMDM infected with *Salmonella*)

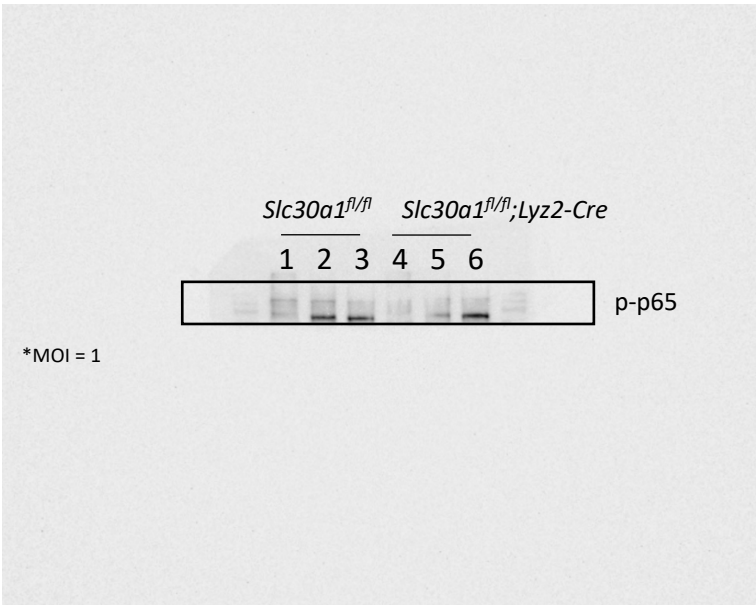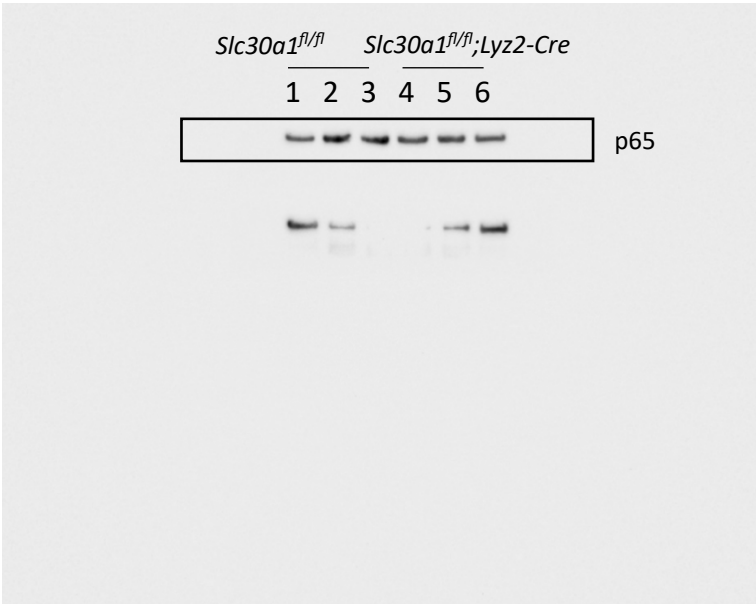

|                                 |                                         |
|---------------------------------|-----------------------------------------|
| Lane 1: Uninfected              | <i>Slc30a1<sup>fl/fl</sup></i>          |
| Lane 2: <i>Salmonella</i> (1 h) |                                         |
| Lane 3: <i>Salmonella</i> (2 h) |                                         |
| Lane 4: Uninfected              | <i>Slc30a1<sup>fl/fl</sup>;Lyz2-Cre</i> |
| Lane 5: <i>Salmonella</i> (1 h) |                                         |
| Lane 6: <i>Salmonella</i> (2 h) |                                         |

Full unedited blots for Figure 5J (p65 expression in BMDM treated with *Salmonella* plus TPEN)

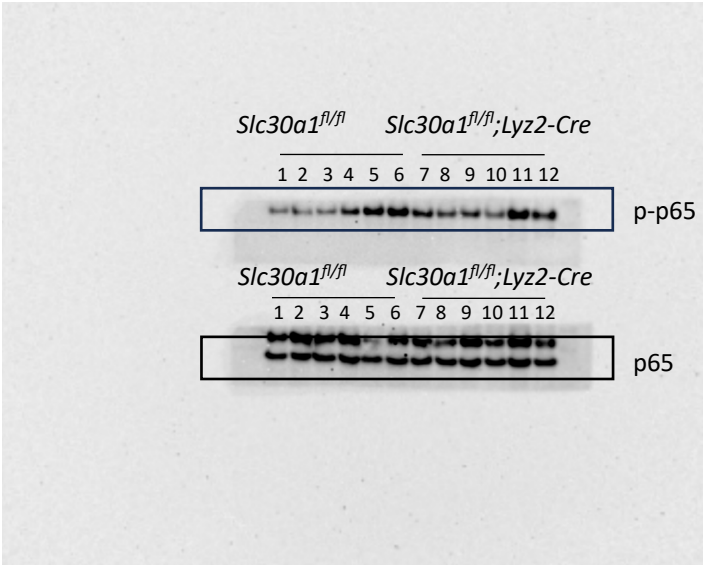

|                                       |  |                                         |
|---------------------------------------|--|-----------------------------------------|
| Lane 1, 2: Uninfected                 |  | <i>Slc30a1<sup>fl/fl</sup></i>          |
| Lane 3, 4: TPEN                       |  |                                         |
| Lane 5, 6: TPEN + <i>Salmonella</i>   |  |                                         |
| Lane 7, 8: Uninfected                 |  | <i>Slc30a1<sup>fl/fl</sup>;Lyz2-Cre</i> |
| Lane 9, 10: TPEN                      |  |                                         |
| Lane 11, 12: TPEN + <i>Salmonella</i> |  |                                         |
