# Supplementary material for: The zinc transporter Slc30a1 (ZnT1) in macrophages plays a protective role against attenuated Salmonella
Source: eLife journal article supplement (doi:10.7554/elife.89509), 2024-09-06
Supplement: fig8-data1 [file elife-89509-fig8-data1-v1.zip]

## Figure 8—Source data 1. Raw images of PCR genotype analysis

Full unedited gel for figure supplement 9B (*Slc30a1-flag-EGFP*)

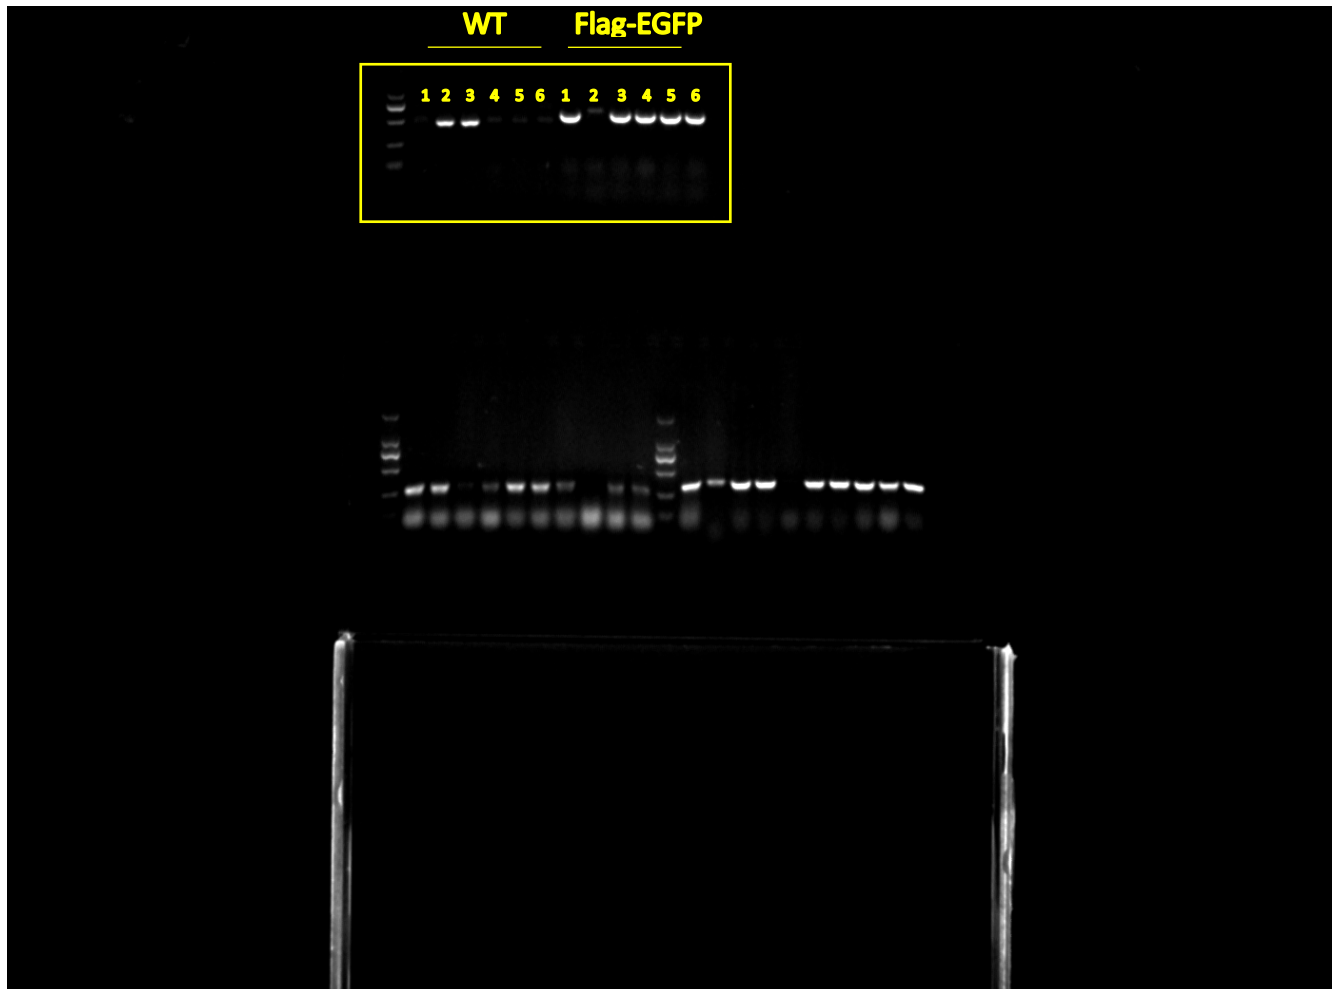

WT    Lane 1: Mutant  
      Lane 2: Wild type  
      Lane 3: Wild type  
      Lane 4: Mutant  
      Lane 5: Mutant

Flag-EGFP    Lane 1: Mutant  
              Lane 2: Wild type  
              Lane 3: Mutant  
              Lane 4: Mutant  
              Lane 5: Mutant  
              Lane 6: Mutant

Input: Lane 1, 4, 5, 6 – *Slc30a1<sup>flag-EGFP/flag-EGFP</sup>*, Lane 3 – *Slc30a1<sup>flag-EGFP/+</sup>*, Lane 2 – Wild type

Full unedited gel for figure supplement 9C (*Slc30a1-flox*)

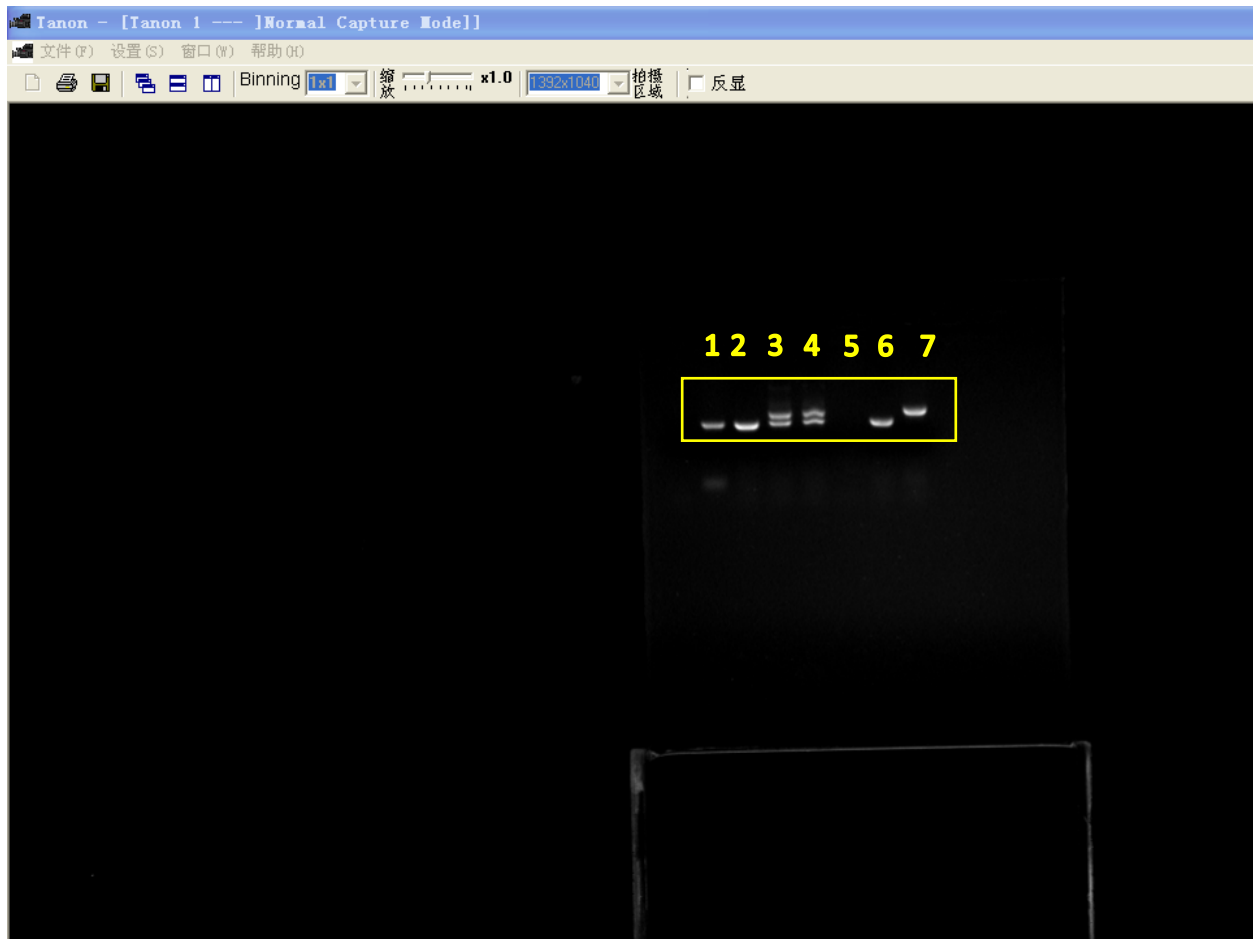

Lane 1: Wild type

Lane 2: Wild type

Lane 3: *Slc30a1*<sup>fl/+</sup>

Lane 4: *Slc30a1*<sup>fl/+</sup>

Lane 5: Blank

Lane 6: Wild type

Lane 7: *Slc30a1*<sup>fl/fl</sup>

Full unedited gel for figure supplement 9C (*Lyz2* Cre)

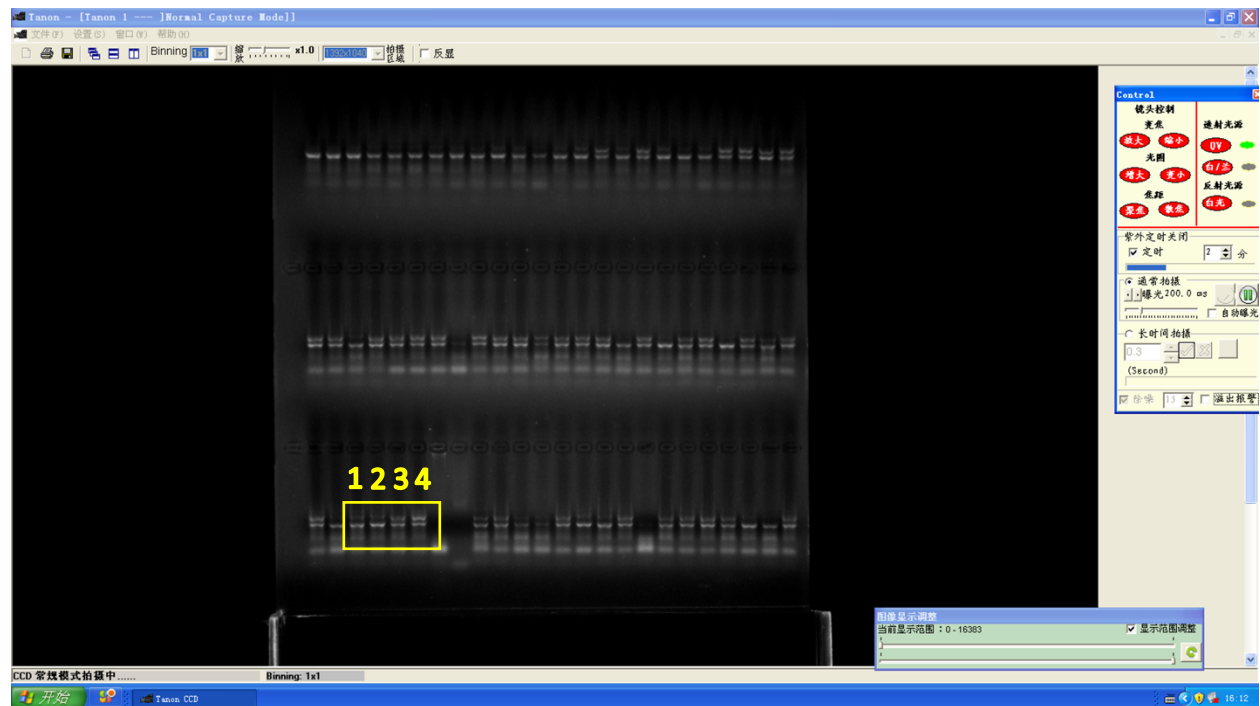

Lane 1: Wild type

Lane 2: Wild type

Lane 3: *Lyz2* Cre<sup>+/-</sup>

Lane 4: *Lyz2* Cre<sup>+/-</sup>
